# Supplementary material for: Pseudo lattice-breathing driven valley switching in 2D ferromagnetic lattices
Source: Royal Society of Chemistry journal article supplement (doi:10.1039/d5mh02014j), 2025-12-20

## Supplementary Information for

### Pseudo Lattice-Breathing Driven Valley Switching in 2D Ferromagnetic Lattices

#### Tight-binding Model

In this system, consisting of a magnetic triangular sublattice (A) and a hexagonal sublattice (B), nearest-neighbor (NN) hopping occurs between the nonequivalent A and B sites, while next-nearest-neighbor (NNN) hopping takes place within the A or B sublattice.

To describe the valley physics of the lattice, we construct an effective tight-binding model for characterizing the low-energy band dispersions near the Fermi level:

$$H(k) = \begin{pmatrix} H_{hop,\uparrow}(k) & 0 \\ 0 & H_{hop,\uparrow}(k) \end{pmatrix} + \begin{pmatrix} H_{soc,\uparrow} & 0 \\ 0 & H_{soc,\uparrow} \end{pmatrix} - \begin{pmatrix} M_A I & 0 & 0 & 0 \\ 0 & M_B I & 0 & 0 \\ 0 & 0 & -M_A I & 0 \\ 0 & 0 & 0 & -M_B I \end{pmatrix} \quad \#(1)$$

where  $H_{hop}$  involves the NN and NNN

hopping terms.  $H_{soc}$  is the on-site SOC term, the up and down arrows indicate the spin-up and spin-down channels, respectively.  $H_M$  is the magnetic exchange field term in the lattice.  $I$  is a unit matrix. and  $M_A$  and  $M_B$  are the applied exchange field strengths on the A site and B site, respectively.

The hopping terms for the spin-up and spin-down channels can both be expressed as ( $H_{hop\uparrow} = H_{hop\downarrow}$ ):

$$H_{hop\uparrow/\downarrow} = \begin{bmatrix} h_{11} & h_{12} & h_{13} & h_{14} \\ h_{21} & h_{22} & h_{23} & h_{24} \\ h_{31} & h_{32} & h_{33} & h_{34} \\ h_{41} & h_{42} & h_{43} & h_{44} \end{bmatrix} \quad \#(2)$$

With the A and B sites of the honeycomb lattice occupied by different atom types that also have distinct orbital types ( $d_{xy}/d_{x^2-y^2}$  at A site and  $p_x/p_y$  at B site) and parameters, the matrix elements  $E_{i,j}(\vec{r}_{n,n'}) = \langle n,i | H | n',j \rangle$  for the tight-binding model are derived using the Slater-Koster overlap integral method. The various integrals are treated as fitting parameters such that the TB model matches accurate calculations at high-symmetry points in the Brillouin zone. The LCAO method is then employed for interpolating band structures across the entire Brillouin zone. The parameters used in this article are as follows :

$$\begin{aligned}
E_{x,x} &= l^2 t_{pp\sigma} + (1 - l^2) t_{pp\pi} \\
E_{x,y} &= l m t_{pp\sigma} - l m t_{pp\pi} \\
E_{x,x^2-y^2} &= \frac{\sqrt{3}}{2} l (l^2 - m^2) V_{pd\sigma} + l (1 - l^2 + m^2) V_{pd\pi} \\
E_{x,xy} &= \sqrt{3} l^2 m V_{pd\sigma} + m (1 - 2l^2) V_{pd\pi} \\
E_{y,y} &= m^2 V_{pp\sigma} + (1 - m^2) V_{pp\pi} \\
E_{y,xy} &= \sqrt{3} m^2 n V_{pd\sigma} + l (1 - 2m^2) V_{pd\pi} \\
E_{y,x^2-y^2} &= \frac{\sqrt{3}}{2} m (l^2 - m^2) V_{pd\sigma} - m (1 + l^2 - m^2) V_{pd\pi} \\
E_{xy,xy} &= 3l^2 m^2 t_{dd\sigma} + (l^2 + m^2 - 4l^2 m^2) t_{dd\pi} + (n^2 + l^2 m^2) t_{dd\delta} \\
E_{x^2-y^2, x^2-y^2} &= \frac{3}{4(l^2 - m^2) t_{dd\sigma}} + [l^2 + m^2 - (l^2 - m^2)^2] t_{dd\pi} + \left[ n^2 + \frac{(l^2 - m^2)^2}{4} \right] t_{dd\delta} \\
E_{xy, x^2-y^2} &= \frac{3}{2} l m (l^2 - m^2) t_{dd\sigma} + 2l m (m^2 - l^2) t_{dd\pi} + \left[ \frac{l m (l^2 - m^2)}{2} \right] t_{dd\delta}
\end{aligned} \tag{3}$$

The  $t_{pp\pi}$ ,  $t_{pp\sigma}$ ,  $t_{dd\pi}$ ,  $t_{dd\sigma}$  and  $t_{dd\delta}$  (the NNN hopping parameters), and  $t_{pd\sigma}$  and  $t_{pd\pi}$  (the NN hopping parameters), which correspond to the  $\pi$ ,  $\sigma$  and  $\delta$  bonds formed by  $p_x/p_y$  and  $d_{xy}/d_{x^2-y^2}$  orbitals. The direction cosines  $l$ ,  $m$ ,  $n$  represent the projections of the interatomic vector along the  $x$ ,  $y$ , and  $z$  directions. For the system studied here, the direction cosines for lattice vectors  $a_1$  and  $a_2$  are  $(l, m, n) = (\sqrt{3}/2, -1/2, 0)$  and  $(\sqrt{3}/2, 1/2, 0)$ , respectively. Thus, each specific matrix element can be obtained:

$$\begin{aligned}
h_{11} &= \varepsilon_d + 2t_{dd\pi} \cos(\sqrt{3}k_y) + \frac{1}{8}(9t_{dd\sigma} + 4t_{dd\pi} + 3t_{dd\delta}) \left( \cos\left(\frac{3}{2}k_x - \frac{\sqrt{3}}{2}k_y\right) + \cos\left(\frac{3}{2}k_x + \frac{\sqrt{3}}{2}k_y\right) \right), \\
h_{12} &= -\frac{\sqrt{3}}{8}(3t_{dd\sigma} - 4t_{dd\pi} + t_{dd\delta}) \left( \cos\left(\frac{3}{2}k_x - \frac{\sqrt{3}}{2}k_y\right) - \cos\left(\frac{3}{2}k_x + \frac{\sqrt{3}}{2}k_y\right) \right), \\
h_{13} &= \left( \frac{3}{8}t_{pd\sigma} + \frac{\sqrt{3}}{4}t_{pd\pi} \right) (e^{i(-\frac{1}{2}k_x + \frac{\sqrt{3}}{2}k_y)} - e^{i(-\frac{1}{2}k_x - \frac{\sqrt{3}}{2}k_y)}), \\
h_{14} &= \frac{\sqrt{3}}{2}t_{pd\sigma} e^{ik_x} + \left( \frac{\sqrt{3}}{8}t_{pd\sigma} - \frac{3}{4}t_{pd\pi} \right) (e^{i(-\frac{1}{2}k_x + \frac{\sqrt{3}}{2}k_y)} + e^{i(-\frac{1}{2}k_x - \frac{\sqrt{3}}{2}k_y)}), \\
h_{22} &= \varepsilon_d + \frac{1}{2}(3t_{dd\sigma} + t_{dd\delta}) \cos(\sqrt{3}k_y) + \frac{1}{8}(3t_{dd\sigma} + 12t_{dd\pi} + t_{dd\delta}) \left( \cos\left(\frac{3}{2}k_x - \frac{\sqrt{3}}{2}k_y\right) + \cos\left(\frac{3}{2}k_x + \frac{\sqrt{3}}{2}k_y\right) \right), \\
h_{23} &= t_{pd\pi} e^{ik_x} + \left( -\frac{3\sqrt{3}}{8}t_{pd\sigma} + \frac{1}{4}t_{pd\pi} \right) (e^{i(-\frac{1}{2}k_x + \frac{\sqrt{3}}{2}k_y)} + e^{i(-\frac{1}{2}k_x - \frac{\sqrt{3}}{2}k_y)}), \\
h_{24} &= \left( -\frac{3}{8}t_{pd\sigma} - \frac{\sqrt{3}}{4}t_{pd\pi} \right) (e^{i(-\frac{1}{2}k_x + \frac{\sqrt{3}}{2}k_y)} - e^{i(-\frac{1}{2}k_x - \frac{\sqrt{3}}{2}k_y)}), \\
h_{33} &= \varepsilon_p + 2t_{pp\pi} \cos(\sqrt{3}k_y) + \left( \frac{3}{2}t_{pp\sigma} + \frac{1}{2}t_{pp\pi} \right) \left( \cos\left(\frac{3}{2}k_x - \frac{\sqrt{3}}{2}k_y\right) + \cos\left(\frac{3}{2}k_x + \frac{\sqrt{3}}{2}k_y\right) \right), \\
h_{34} &= \frac{\sqrt{3}}{2}(t_{pp\pi} - t_{pp\sigma}) \left( \cos\left(\frac{3}{2}k_x - \frac{\sqrt{3}}{2}k_y\right) - \cos\left(\frac{3}{2}k_x + \frac{\sqrt{3}}{2}k_y\right) \right), \\
h_{44} &= \varepsilon_p + 2t_{pp\sigma} \cos(\sqrt{3}k_y) + \left( \frac{1}{2}t_{pp\sigma} + \frac{3}{2}t_{pp\pi} \right) \left( \cos\left(\frac{3}{2}k_x - \frac{\sqrt{3}}{2}k_y\right) + \cos\left(\frac{3}{2}k_x + \frac{\sqrt{3}}{2}k_y\right) \right), \\
h_{21} &= h_{12}, h_{43} = h_{34}, h_{31} = -h_{13}^*, h_{32} = -h_{23}^*, h_{41} = -h_{14}^*, h_{42} = -h_{24}^*
\end{aligned} \tag{4}$$

Here, the  $\varepsilon_p$  and  $\varepsilon_d$  are respectively the on-site energy for  $p_x/p_y$  and  $d_{xy}/d_{x^2-y^2}$  orbitals.

For the different spin subspaces, the on-site SOC is written as a  $4 \times 4$  matrix:

$$H_{soc\uparrow/\downarrow} = s \cdot \begin{bmatrix} 0 & -\lambda_A i & 0 & 0 \\ \lambda_A i & 0 & 0 & 0 \\ 0 & 0 & 0 & 2\lambda_B i \\ 0 & 0 & -2\lambda_B i & 0 \end{bmatrix} \#(5)$$

Where  $\lambda_A$  and  $\lambda_B$  is the atomic SOC strength of the A site and B site, respectively.  $s = \pm 1$  represent the spin-up and spin-down components, respectively. The details of the specific values are listed in Table S1 and Table S2.

**Table S1.** The Slater-Koster overlap integral method parameters for the band dispersions near the Fermi level. All the parameters are in units of eV.

| $\varepsilon_p$ | $\varepsilon_d$ | $t_{pp\sigma}$ | $t_{pp\pi}$ | $t_{pd\sigma}$ | $t_{pd\pi}$ | $t_{dd\sigma}$ | $t_{dd\pi}$ | $t_{dd\delta}$ |
|-----------------|-----------------|----------------|-------------|----------------|-------------|----------------|-------------|----------------|
| -0.35           | 0.54            | -0.04          | 0.07        | 0.01           | -0.05       | -0.15          | 0.02        | 0.3            |

**Table S2.** The tight-binding model parameters for the band dispersions near the Fermi level. All the parameters are in units of eV.

| $\lambda_A$ | $\lambda_B$ | $M_A$ | $M_B$ | s |
|-------------|-------------|-------|-------|---|
| 0.15        | 0.18        | 0.02  | 0.02  | 1 |

**Fig. S1** (a) ferromagnetic (FM), two antiferromagnetic (AFM), (b) G-AFM, (c) C-AFM, and (d) ferrimagnetic (FIM) configurations of EuGe<sub>2</sub> monolayer. J presents the magnetic coupling paramant between the nearest neighboring (NN) Eu atoms.

(a)

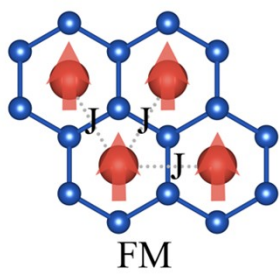

(b)

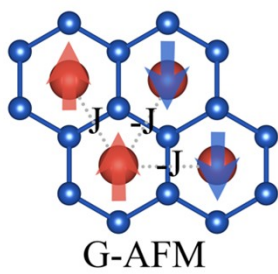

(c)

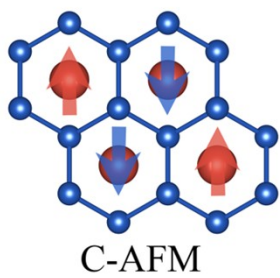

(d)

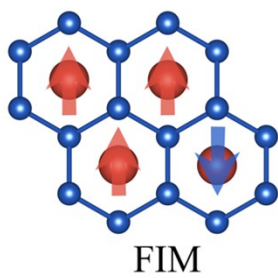

Supplement: d5mh02014j1.pdf [file d5mh02014j1.pdf]
